# Supplementary material for: Statistical Analysis of Readthrough Levels for Nonsense Mutations in Mammalian Cells Reveals a Major Determinant of Response to Gentamicin
Source: PubMed Central journal article supplement (PMC3315467; doi:10.1371/journal.pgen.1002608), 2012-03-29
Supplement: pgen.1002608.s004.pdf [file pgen.1002608.s004.pdf]

**Table S1:** List of the 66 sequences containing a stop codon, with basal readthrough (B), gentamicin induced readthrough (G), increase factor between basal and induced readthrough (I) and the classified group in response-type.

| Stop codon and its nucleotide context <sup>a</sup> |    |    |   |    |    |      |    |    |    |    | Name <sup>b</sup> | B | G <sup>±</sup> | I | Response-Type |    |    |   |   |   |   |   |         |             |          |       |       |     |   |
|----------------------------------------------------|----|----|---|----|----|------|----|----|----|----|-------------------|---|----------------|---|---------------|----|----|---|---|---|---|---|---------|-------------|----------|-------|-------|-----|---|
| -6                                                 | -5 | -4 | 3 | -2 | -1 | Stop | +4 | +5 | +6 | +7 |                   |   |                |   |               | +8 | +9 |   |   |   |   |   |         |             |          |       |       |     |   |
| A                                                  | G  | A  | A | A  | C  | A    | C  | T  | T  | T  | T                 | T | G              | A | C             | A  | T  | A | G | T | G | T | G       | p53 213     | 0.47%    | 2.79% | 6.0   | 1   |   |
| C                                                  | G  | C  | T | C  | T  | A    | T  | C  | G  | C  | G                 | T | A              | A | C             | T  | A  | G | G | C | A | T | A       | CF 122      | 0.52%    | 1.71% | 3.3   | 1   |   |
| C                                                  | T  | C  | A | T  | C  | C    | A  | G  | C  | T  | T                 | T | G              | A | C             | A  | T  | G | G | C | A | A | T       | APC 360     | 0.20%    | 1.58% | 7.8   | 1   |   |
| G                                                  | C  | C  | A | C  | A  | C    | T  | G  | A  | G  | T                 | T | A              | G | C             | T  | G  | C | A | C | T | G | T       | beta 90     | 0.18%    | 1.43% | 7.9   | 1   |   |
| G                                                  | C  | C  | A | G  | A  | G    | A  | G  | A  | A  | A                 | T | A              | G | C             | T  | A  | C | A | G | A | C | A       | DMD 931     | 0.36%    | 0.94% | 2.6   | 1   |   |
| A                                                  | A  | A  | A | A  | C  | A    | A  | A  | T  | T  | T                 | T | G              | A | A             | C  | C  | A | A | A | A | G | G       | DMD 3381    | 0.11%    | 0.93% | 8.3   | 1   |   |
| T                                                  | T  | C  | T | G  | C  | A    | C  | G  | T  | G  | C                 | T | G              | A | C             | C  | T  | G | G | A | G | C | C       | CMD 1549    | 0.11%    | 0.82% | 7.5   | 1   |   |
| T                                                  | C  | A  | G | A  | A  | C    | A  | A  | A  | T  | T                 | G | A              | G | G             | T  | G  | G | G | T | T | C | T       | APC 1114    | 0.07%    | 0.73% | 10.8  | 2   |   |
| C                                                  | T  | G  | G | C  | C  | C    | T  | C  | T  | C  | T                 | T | A              | G | C             | A  | T  | C | T | T | A | T | C       | p53 192     | 0.05%    | 0.66% | 12.9  | 2   |   |
| G                                                  | A  | C  | C | G  | A  | C    | A  | A  | G  | G  | G                 | T | G              | A | T             | T  | T  | G | A | C | A | G | A       | DMD 2098    | 0.27%    | 0.65% | 2.4   | 1   |   |
| G                                                  | T  | C  | A | C  | C  | A    | C  | C  | A  | C  | T                 | T | A              | G | C             | C  | A  | T | C | A | C | T | A       | DMD 673     | 0.11%    | 0.57% | 5.2   | 1   |   |
| T                                                  | A  | T  | G | A  | T  | A    | C  | G  | G  | G  | A                 | T | G              | A | A             | C  | A  | G | G | G | A | G | G       | DMD 3190    | 0.18%    | 0.57% | 3.2   | 1   |   |
| G                                                  | A  | G  | C | C  | T  | C    | A  | C  | C  | A  | C                 | T | A              | G | C             | T  | G  | C | C | C | C | C | A       | p53 298     | 0.07%    | 0.52% | 7.6   | 2   |   |
| A                                                  | G  | C  | C | C  | A  | T    | T  | T  | C  | C  | T                 | T | G              | A | C             | A  | G  | C | A | T | T | T | G       | DMD 319     | 0.06%    | 0.53% | 8.8   | 2   |   |
| T                                                  | T  | T  | G | C  | T  | C    | A  | G  | T  | T  | T                 | T | G              | A | A             | G  | A  | C | T | A | A | A | C       | DMD 1967    | 0.07%    | 0.40% | 5.8   | 3   |   |
| A                                                  | C  | C  | T | G  | C  | C    | C  | T  | G  | T  | G                 | T | A              | G | C             | T  | G  | T | G | G | G | T | T       | p53 144     | 0.09%    | 0.39% | 4.9   | 3   |   |
| A                                                  | G  | C  | T | C  | C  | T    | C  | T  | C  | C  | C                 | T | A              | G | C             | C  | A  | A | A | G | A | A | G       | p53 317     | 0.04%    | 0.37% | 9.5   | 2   |   |
| A                                                  | C  | T  | T | T  | G  | C    | A  | A  | C  | A  | G                 | T | G              | A | A             | G  | G  | A | A | A | G | C | C       | CF 282      | 0.12%    | 0.35% | 3.0   | 3   |   |
| G                                                  | T  | T  | A | C  | T  | G    | C  | C  | C  | T  | G                 | T | G              | A | G             | G  | C  | A | A | G | G | T | G       | beta 15 TGA | 0.09%    | 0.34% | 3.8   | 3   |   |
| G                                                  | A  | T  | G | A  | T  | A    | C  | A  | T  | A  | G                 | T | G              | A | G             | A  | C  | A | A | T | T | T | T       | APC 811     | 0.04%    | 0.34% | 8.9   | 2   |   |
| A                                                  | T  | C  | C | A  | A  | T    | C  | T  | G  | A  | T                 | T | A              | G | A             | C  | A  | A | A | G | T | C | A       | T           | DMD 1417 | 0.05% | 0.33% | 7.0 | 3 |
| T                                                  | T  | C  | G | A  | G  | A    | T  | G  | T  | T  | C                 | T | G              | A | G             | A  | G  | C | T | G | A | A | T       | p53 342     | 0.06%    | 0.32% | 5.5   | 3   |   |
| G                                                  | C  | T  | C | A  | A  | A    | C  | C  | A  | A  | G                 | T | G              | A | G             | A  | A  | G | T | A | C | C | T       | APC 1450    | 0.04%    | 0.31% | 8.0   | 2   |   |
| C                                                  | A  | G  | C | A  | T  | C    | T  | T  | A  | T  | C                 | T | G              | A | G             | T  | G  | G | A | A | G | G | A       | p53 196     | 0.04%    | 0.31% | 6.9   | 3   |   |
| C                                                  | C  | T  | G | T  | G  | C    | A  | G  | C  | T  | G                 | T | G              | A | G             | T  | T  | G | A | T | T | C | C       | p53 146     | 0.06%    | 0.30% | 4.8   | 3   |   |
| T                                                  | T  | G  | G | T  | C  | T    | A  | C  | C  | C  | T                 | T | G              | A | A             | C  | C  | C | A | G | A | G | G       | beta 37TGA  | 0.03%    | 0.30% | 10.2  | 2   |   |
| G                                                  | A  | T  | A | T  | G  | G    | A  | A  | A  | A  | A                 | T | G              | A | G             | C  | A  | C | A | G | C | G | A       | APC 213     | 0.05%    | 0.28% | 6.0   | 3   |   |
| G                                                  | T  | T  | A | C  | T  | G    | C  | C  | C  | T  | G                 | T | A              | G | G             | G  | C  | A | A | G | G | T | G       | beta 15 TAG | 0.08%    | 0.27% | 3.5   | 3   |   |
| A                                                  | A  | T  | A | T  | A  | G    | T  | T  | C  | T  | T                 | T | G              | A | G             | A  | A  | G | G | T | G | G | A       | CF 542      | 0.02%    | 0.26% | 13.0  | 2   |   |
| A                                                  | G  | T  | A | T  | T  | C    | G  | T  | T  | C  | T                 | T | G              | A | G             | G  | T  | T | G | C | A | T | C       | CMD 3085    | 0.05%    | 0.25% | 5.0   | 3   |   |
| G                                                  | A  | A  | G | T  | T  | G    | G  | T  | G  | T  | T                 | A | G              | G | C             | C  | C  | T | G | G | G | C | C       | beta 26     | 0.05%    | 0.24% | 4.9   | 3   |   |
| G                                                  | G  | G  | A | G  | C  | A    | C  | T  | A  | A  | G                 | T | G              | A | G             | C  | A  | C | T | G | C | C | C       | p53 306     | 0.05%    | 0.24% | 5.2   | 3   |   |
| G                                                  | A  | T  | A | G  | C  | C    | C  | T  | G  | G  | A                 | T | A              | A | A             | C  | C  | A | T | G | C | C | A       | APC 1429    | 0.08%    | 0.23% | 2.8   | 3   |   |
| A                                                  | G  | G  | C | C  | C  | T    | G  | G  | A  | A  | C                 | T | G              | A | G             | G  | G  | G | C | G | T | T | C       | STOP LAM    | 0.05%    | 0.23% | 5.0   | 3   |   |
| G                                                  | A  | T  | A | T  | T  | G    | A  | A  | C  | A  | A                 | T | A              | G | T             | T  | C  | A | C | T | G | A | A       | p53 53      | 0.04%    | 0.23% | 5.3   | 3   |   |
| C                                                  | G  | A  | T | C  | T  | G    | T  | G  | A  | G  | C                 | T | G              | A | G             | T  | C  | T | T | T | A | A | G       | CF 1162     | 0.02%    | 0.22% | 10.0  | 2   |   |
| G                                                  | G  | C  | T | G  | T  | T    | C  | C  | C  | T  | T                 | G | A              | A | A             | C  | T  | G | C | A | A | T | C       | CMD 967     | 0.04%    | 0.22% | 5.8   | 3   |   |
| T                                                  | T  | G  | C | C  | C  | C    | T  | G  | C  | G  | C                 | T | A              | G | G             | G  | A  | A | T | T | C | T | C       | DMD 2264    | 0.05%    | 0.21% | 4.3   | 3   |   |
| C                                                  | C  | T  | A | G  | G  | C    | A  | C  | A  | G  | G                 | T | G              | A | G             | T  | T  | A | A | C | G | G | C       | CMD 744     | 0.04%    | 0.20% | 5.0   | 3   |   |
| A                                                  | A  | C  | G | T  | G  | C    | T  | G  | G  | T  | C                 | T | G              | A | G             | T  | G  | C | T | G | G | C | C       | beta 112    | 0.06%    | 0.20% | 3.0   | 3   |   |
| A                                                  | G  | A  | A | C  | T  | G    | T  | G  | A  | C  | C                 | T | G              | A | G             | A  | A  | G | A | C | T | T | C       | CMD 1326    | 0.02%    | 0.18% | 9.1   | 2   |   |
| C                                                  | A  | G  | T | C  | T  | T    | G  | T  | G  | T  | T                 | A | G              | A | G             | A  | A  | G | A | T | G | A | C       | APC 1131    | 0.01%    | 0.18% | 16.3  | 2   |   |
| C                                                  | T  | G  | G | A  | T  | G    | A  | G  | A  | T  | A                 | A | A              | T | T             | C  | A  | C | C | C | T | T | p53 327 | 0.03%       | 0.15%    | 5.9   | 3     |     |   |
| G                                                  | T  | G  | A | A  | C  | G    | T  | G  | G  | A  | T                 | T | A              | A | G             | T  | T  | G | G | T | G | G | T       | beta E22    | 0.03%    | 0.14% | 4.6   | 3   |   |
| C                                                  | A  | G  | A | G  | G  | T    | T  | C  | T  | T  | T                 | T | A              | G | T             | C  | C  | T | T | T | G | G | G       | beta 43     | 0.01%    | 0.14% | 10.9  | 2   |   |
| A                                                  | A  | A  | A | G  | T  | G    | G  | T  | G  | C  | T                 | T | A              | G | A             | C  | A  | C | C | C | A | A | A       | APC 1367    | 0.02%    | 0.13% | 6.7   | 3   |   |
| A                                                  | A  | A  | C | T  | T  | C    | C  | A  | G  | A  | A                 | T | A              | A | T             | T  | T  | G | A | A | G | G | A       | CMD 1240    | 0.02%    | 0.12% | 6.6   | 3   |   |
| C                                                  | A  | G  | G | A  | T  | T    | T  | G  | A  | A  | T                 | A | G              | A | G             | A  | G  | C | G | T | C | C | C       | DMD 2522    | 0.02%    | 0.12% | 6.7   | 3   |   |
| A                                                  | T  | G  | G | A  | T  | A    | T  | C  | C  | T  | G                 | T | A              | G | A             | T  | T  | A | T | T | A | A | T       | DMD 3149    | 0.04%    | 0.12% | 3.0   | 3   |   |
| A                                                  | A  | C  | C | C  | T  | A    | A  | G  | G  | T  | G                 | T | A              | G | G             | C  | T  | C | A | T | G | G | C       | beta 61     | 0.03%    | 0.12% | 4.4   | 3   |   |
| G                                                  | A  | T  | A | G  | A  | A    | G  | T  | T  | T  | G                 | T | A              | G | A             | G  | A  | G | A | A | C | G | C       | APC 853     | 0.02%    | 0.12% | 5.4   | 3   |   |
| T                                                  | A  | C  | C | C  | T  | T    | G  | G  | A  | C  | C                 | T | A              | G | A             | G  | G  | T | T | C | T | T | T       | beta 39     | 0.03%    | 0.11% | 4.2   | 3   |   |
| C                                                  | A  | A  | T | G  | T  | T    | G  | T  | G  | C  | T                 | A | A              | C | C             | T  | G  | G | A | G | T | C | C       | CMD 988     | 0.02%    | 0.11% | 6.6   | 3   |   |
| A                                                  | A  | G  | A | A  | G  | A    | A  | G  | A  | A  | G                 | T | A              | G | A             | A  | G  | C | A | A | C | C | C       | STOP PLATI  | 0.03%    | 0.10% | 3.0   | 3   |   |
| G                                                  | C  | A  | G | A  | A  | A    | T  | A  | A  | A  | A                 | T | A              | A | A             | A  | G  | A | T | T | G | G | A       | APC 1309    | 0.02%    | 0.10% | 5.2   | 3   |   |
| G                                                  | C  | T  | A | C  | A  | G    | A  | T  | A  | T  | G                 | T | A              | A | T             | T  | G  | A | C | A | A | A | G       | DMD 1593    | 0.03%    | 0.09% | 3.2   | 3   |   |
| G                                                  | C  | C  | C | T  | G  | T    | G  | G  | G  | G  | C                 | T | A              | G | G             | T  | G  | A | A | C | G | T | G       | beta 17     | 0.03%    | 0.09% | 2.9   | 3   |   |
| C                                                  | A  | T  | C | G  | T  | A    | G  | T  | A  | A  | G                 | T | A              | G | A             | G  | A  | C | A | C | A | A | G       | APC 789     | 0.03%    | 0.09% | 3.4   | 3   |   |
| C                                                  | A  | C  | T | T  | G  | G    | C  | A  | A  | A  | T                 | A | G              | A | T             | T  | C  | A | C | C | C | C | A       | beta 121    | 0.03%    | 0.09% | 3.4   | 3   |   |
| G                                                  | T  | G  | G | T  | C  | T    | A  | C  | C  | C  | T                 | T | A              | G | A             | C  | C  | C | A | G | A | G | G       | beta 37 TAG | 0.02%    | 0.09% | 5.6   | 3   |   |
| C                                                  | T  | G  | C | T  | G  | C    | T  | G  | C  | T  | C                 | T | A              | A | C             | C  | T  | T | G | G | A | C | C       | beta 35     | 0.02%    | 0.08% | 5.5   | 3   |   |
| G                                                  | A  | T  | C | A  | C  | A    | T  | G  | T  | G  | C                 | T | A              | A | C             | A  | G  | G | T | C | T | A | T       | DMD 1143    | 0.01%    | 0.08% | 10.7  | 2   |   |
| T                                                  | T  | G  | A | A  | A  | G    | A  | G  | C  | A  | A                 | T | A              | A | A             | A  | T  | G | G | C | T | T | C       | MDX         | 0.02%    | 0.06% | 3.6   | 3   |   |
| A                                                  | C  | A  | G | A  | A  | G    | C  | T  | G  | A  | A                 | T | A              | G | T             | T  | C  | T | C | A | A | G | A       | DMD 2125    | 0.04%    | 0.06% | 1.6   | 3   |   |
| A                                                  | C  | C  | C | C  | A  | C    | A  | G  | T  | G  | T                 | A | G              | G | T             | C  | T  | G | C | C | T | A | T       | beta 127    | 0.02%    | 0.05% | 3.1   | 3   |   |
| G                                                  | A  | A  | A | G  | G  | C    | T  | C  | C  | T  | A                 | T | A              | A | G             | A  | C  | T | C | C | A | A | G       | DMD 2726    | 0.01%    | 0.04% | 5.9   | 3   |   |

<sup>a</sup> These sequences were inserted into the dual reporter vector in order to determine readthrough level.

<sup>b</sup> Nonsense mutations are named by the gene or the disease related to and by their position (amino-acid). p53 mutations are involved in cancers; DMD and CMD mutations are involved in muscular dystrophies; CF mutations are involved in cystic fibrosis and beta mutations are involved in beta-thalassemia disease (see Materials et Methods for references).

<sup>±</sup> Nonsense mutations are classified according to their gentamicin induced readthrough level.
