# Supplementary material for: Statistical Analysis of Readthrough Levels for Nonsense Mutations in Mammalian Cells Reveals a Major Determinant of Response to Gentamicin
Source: PubMed Central journal article supplement (PMC3315467; doi:10.1371/journal.pgen.1002608), 2012-03-29
Supplement: pgen.1002608.s005.pdf [file pgen.1002608.s005.pdf]

**Table S2:** Descriptive statistics for the 3 parameters B, G and I (before Box-Cox transformation)

| <b>Basal readthrough (B)</b>              |         |
|-------------------------------------------|---------|
| Mean                                      | 0.072%  |
| Standard error of the mean                | 0.012%  |
| Median                                    | 0.040%  |
| Mode                                      | 0.040%  |
| Standard deviation                        | 0.098%  |
| Sample variance                           | 0.0001% |
| Kurtosis (Flattening coefficient)         | 11.11   |
| Asymmetry coefficient                     | 3.22    |
| Plage                                     | 0.01    |
| Minimum                                   | 0.01%   |
| Maximum                                   | 0.53%   |
| Sum                                       | 4.74%   |
| Number                                    | 66      |
| <b>Gentamicin-induced readthrough (G)</b> |         |
| Mean                                      | 0.372%  |
| Standard error of the mean                | 0.056%  |
| Median                                    | 0.231%  |
| Mode                                      | 0.200%  |
| Standard deviation                        | 0.458%  |
| Sample variance                           | 0.002%  |
| Kurtosis (Flattening coefficient)         | 12.72   |
| Asymmetry coefficient                     | 3.23    |
| Plage                                     | 0.03    |
| Minimum                                   | 0.04%   |
| Maximum                                   | 2.79%   |
| Sum                                       | 24.53%  |
| Number                                    | 66      |
| <b>Increase factor (I)</b>                |         |
| Mean                                      | 6.0     |
| Standard error of the mean                | 0.4     |
| Median                                    | 5.5     |
| Mode                                      | 3.0     |
| Standard deviation                        | 2.9     |
| Sample variance                           | 8.3     |
| Kurtosis (Flattening coefficient)         | 1.6     |
| Asymmetry coefficient                     | 1.2     |
| Plage                                     | 14.7    |
| Minimum                                   | 1.6     |
| Maximum                                   | 16.3    |
| Sum                                       | 398.6   |
| Number                                    | 66      |
