# Supplementary material for: Statistical Analysis of Readthrough Levels for Nonsense Mutations in Mammalian Cells Reveals a Major Determinant of Response to Gentamicin
Source: PubMed Central journal article supplement (PMC3315467; doi:10.1371/journal.pgen.1002608), 2012-03-29
Supplement: pgen.1002608.s006.pdf [file pgen.1002608.s006.pdf]

Table S3 : Shapiro Test after Box-cox transformation ( $\lambda = -0.217$ )

|                           |       |
|---------------------------|-------|
| Basal readthrough (B)     |       |
| W                         | 0.988 |
| p-value                   | 0.794 |
| alpha                     | 0.05  |
| Gentamicin readthrough(G) |       |
| W                         | 0.990 |
| p-value                   | 0.865 |
| alpha                     | 0.05  |
| Increase Factor (I):      |       |
| W                         | 0.990 |
| p-value                   | 0.859 |
| alpha                     | 0.05  |
