# Supplementary material for: Statistical Analysis of Readthrough Levels for Nonsense Mutations in Mammalian Cells Reveals a Major Determinant of Response to Gentamicin
Source: PubMed Central journal article supplement (PMC3315467; doi:10.1371/journal.pgen.1002608), 2012-03-29
Supplement: pgen.1002608.s007.pdf [file pgen.1002608.s007.pdf]

**Table S4:** Bravais-Pearson statistical analysis of correlation between basal readthrough, induced readthrough and gentamicin response (Increase Factor) after Box-Cox transformation

**R**

| Variables       | Basal | Gentamicin | Increase Factor |
|-----------------|-------|------------|-----------------|
| Basal           | 1     | 0.845      | -0.296          |
| Gentamicin      |       | 1          | 0.248           |
| Increase Factor |       |            | 1               |

**p-values:**

| Variables       | Basal | Gentamicin | Increase Factor |
|-----------------|-------|------------|-----------------|
| Basal           |       | < 0.0001   | 0.016           |
| Gentamicin      |       |            | 0.045           |
| Increase Factor |       |            |                 |
