# Supplementary material for: Statistical Analysis of Readthrough Levels for Nonsense Mutations in Mammalian Cells Reveals a Major Determinant of Response to Gentamicin
Source: PubMed Central journal article supplement (PMC3315467; doi:10.1371/journal.pgen.1002608), 2012-03-29
Supplement: pgen.1002608.s008.pdf [file pgen.1002608.s008.pdf]

**Table S5:** Statistical analysis of the effect of the type of stop codon on B, G and I after Box-Cox transformation using a common lambda: -0.217 (this transformation leads to negative value for B and G).

| Stop codon                 | Actual number | B                        | G                        | I             |
|----------------------------|---------------|--------------------------|--------------------------|---------------|
| <b>UGA</b> mean (variance) | 27            | -18.47 (13.82)           | - 10.93 (4.15)           | 1.48 (0.09)   |
| <b>UAG</b> mean (variance) | 25            | -20.73 (16.22)           | - 13.43 (10.63)          | 1.33 (0.12)   |
| <b>UAA</b> mean (variance) | 14            | -24.11 (31.96)           | - 15.25 (10.11)          | 1.38 (0.10)   |
| Bartlett test (p)          |               | 0.1755                   | 0.0532                   | 0.7404        |
| ANOVA : F (2;63)=          |               | <b>7.98, p=0.0008</b>    | <b>12.00, p=0.000038</b> | 1.47, p=0.238 |
| LSD test (C.I. 93%)        |               | <b>UGA&gt;UAG&gt;UAA</b> | <b>UGA&gt;UAG&gt;UAA</b> | /             |
